# Supplementary material
Source: publisher figshare collection journal article supplement (https://rs.figshare.com/ndownloader/files/12559253)
Supplement: Supplementary file 1 [file 12559253]

## Sheet: Group 1
M. roeselii
Group 1, females Control vs glue-covered, males with one titillator removed
ID FEMALE	tit_mov_freq_1.	tit_mov_freq_2.	cop_dur_1.	cop_dur_2.	Sp_tran_dur_1.	Sp_tran_dur_2.	sucess _1.	sucess _2.	resist_behav_1.	resist_behav_2.	walking_1.	walking_2.	kicking_1.	kicking_2.	jumping_1.	jumping_2.	biting_1.	biting_2.	diconnections_1.	disconnections_2.	male_body_mass_1.	male_body_mass_2.	spermatophore_mass_1.	spermatophore_mass_2.
R28	6.5	10.5	34.0667	27.4667	1.36667	1.35	1	1	1	0	4.16667		16		8		6				251	343	27	38
R33	9	9.5	41.9667	36.4667	1.06667	1.58333	1	1	1	0	0.783333				2				1		273	303	32	32
R34	10.5	12	27.6	39.0667	1.46667	1.35	1	1	0	0											255	299	30	39
R35	9.5	12	34.9	22.75	1.58333	1.25	1	1	0	0											299	270	39	42
R43	11	11	28.9833	36.2	1.23333	1.28333	1	1	0	0											365	276	48	24
R44	12	17	49.1167	34.3667	1.41667	1.63333	1	1	1	0	0.166667										199	285	26	36
R46	17	10	38.85	36.7	1.41667	1.16667	1	1	1	0	0.3		1								274	282	33	34
R49	14.5	9.5	29.5	42.4	1.33333	1.68333	1	1	0	0											224	265	26	44
R53	4	6.5	30.2167	45.1333	1.55	1.75	1	1	0	0											286	287	37	56
R54	9.5	6.5	39.45	33.1667	1.48333	1.86667	1	1	0	0											306	318	36	39
R55	10	6	43.9333	39.35	0	1.35	0	1	1	0	1.53333		1		1				1 (*)		351	295		35
R56	9.5	5.5	32.1333	37.6833	1.86667	1.48333	1	1	0	0											331	307	53	33
R57	10	11.5	37.6	24.85	1.6	1.33333	1	1	0	0											306	286	39	47
R58	5	10.5	39.6667	25.6167	1.45	1.26667	1	1	0	0											301	261	47	39
R59	8	7.5	18.5	42.4667	1.46667	1.45	1	1	0	0											339	233	44	35
R60	7.5	16.5	36.5167	35.05	1.31667	1.33333	1	1	1	0	0.85				1				1		242	264	29	36
N	16	16	16	16	16	16	16	16	16	16	6	0	18	0	12	0	6	0	3	0	16	16	15	16
Mean	9.59375	10.125	35.1875	34.9208	1.35104	1.44583	0.9375	1	0.375	0	1.3										287.625	285.875	36.4	38.0625
±SD	3.23635	3.36898	7.38448	6.65274	0.400484	0.201522	0.25	0	0.5	0	1.485										46.4038	25.8015	8.55904	7.11307
±SE	0.809087	0.842244	1.84612	1.66319	0.100121	0.0503805	0.0625	0	0.125	0	0.606248										11.601	6.45037	2.20993	1.77827
Legend:																			(*)	female was not accepting to mate again after the disconnection
1.	first mating (female control, male one titillator removed T-1)
2.	2nd mating (female glue covered, male one titillator removed T-1)
tit_mov_freq	Titillator movements / min
cop_dur	Copula duration (min)
Sp_tran_dur	Spermatophore transfer duration (min)
sucess	Success of spermatophore transfer (yes=1; no=0)
resist_behav	female resistance behaviour during copulation (yes=1; no=0)
walking	female walking during copulation (min)
kicking	number of female kicks
jumping	number of female jumps
biting	number of female bites towards the male
disconnections	number of disconnections during copulation
male_body_mass	male body mass (mg)
spermatophore_mass	spermatophore mass

## Sheet: Group 2
M. roeselii
Group 2, females pymetrozine treated vs pymetrozine treated + 1d, males with one titillator removed
ID FEMALE	tit_mov_freq_1.	tit_mov_freq_2.	cop_dur_1.	cop_dur_2.	Sp_tran_dur_1.	Sp_tran_dur_2.	sucess _1.	sucess _2.	resist_behav_1.	resist_behav_2.	walking_1.	walking_2.	kicking_1.	kicking_2.	jumping_1.	jumping_2.	biting_1.	biting_2.	diconnections_1.	disconnections_2.	male_body_mass_1.	male_body_mass_2.	spermatophore_mass_1.	spermatophore_mass_2.
16	14	10.5	38.2833	29.9333	1.8	1.5	1	1	0	1		0.416667								1	237	266	29	34
17	11	11	37.3333	35.7833	1.5	1.58333	1	1	0	0											246	260	32	32
22	11	11.5	31.95	41.1	1.5	1.83333	1	1	0	1		0.666667									299	316	39	42
25	14.5	16	32.1167	33	1.5	1.5	1	1	0	0											320	318	38	36
26	7	12	46.7	28.0333	1.83333	1.5	1	1	0	1		0.516667		2						1	314	295	40	40
27	12	13.5	36	36	1.45	1.31667	1	1	0	0											280	264	31	29
29	10.5	8	35.35	33.5833	1.51667	1.63333	1	1	1	0	0.116667										347	373	36	36
31	13	9	36.6833	32.6667	1	1.85	1	1	0	0											273	293	28	33
32	13	10.5	42.8667	39.1167	1.4	1.8	1	1	0	0											260	264	30	36
36	7.5	11	34.6	39.5833	1.08333	1.58333	1	1	0	1		0.416667				1					248	303	33	30
37	8.5	7	24.7167	27.9667	1.06667	1.05	1	1	0	1		0.666667								1	270	266	37	37
38	16.5	10	29.5	28.55	1.23333	1.41667	1	1	0	0											320	299	48	46
39	10	10	24.4167	31	1.48333	1.33333	1	1	0	0											292	324	31	27
40	7	11.5	30	32.5333	1.5	1.13333	1	1	0	1		0.516667									279	289	28	24
41	11.5	12	34.5667	32.9667	1.51667	1.5	1	1	0	0											270	285	31	30
42	6.5	9	37.2	38.6833	1.48333	1.46667	1	1	0	1		0.833333								1	306	293	35	35
47	10	9.5	51.25	37.6167	2.31667	1.25	1	1	0	0											247	239	34	26
48	12.5	7	32.1	42.2667	1.35	1.16667	1	1	0	0											279	263	30	31
50	13.5	6.5	29.1167	34.5167	1.16667	1.28333	1	1	0	0											288	307	28	29
52	16	11.5	40.2167	43.1	1.48333	1.31667	1	1	0	0											290	278	32	35
N	20	20	20	20	20	20	20	20	20	20	1	7	0	2	0	1	0	0	0	4	20	20	20	20
Mean	11.275	10.35	35.2483	34.9	1.45917	1.45083	1	1	0.05	0.35	0.116667	0.57619									283.25	289.75	33.5	33.4
±SD	2.95348	2.28899	6.68001	4.6937	0.296	0.225655	0	0	0.223607	0.48936		0.153012									28.7894	29.9031	5.04193	5.47146
±SE	0.660418	0.511834	1.4937	1.04954	0.0661877	0.0504581	0	0	0.05	0.109424		0.0578331									6.4375	6.68654	1.12741	1.22345
Legend:
1.	1.mating (female pymetrozine treated, male one titillator removed)
2.	2nd mating (female pymetrozine treated + 1d, male one titillator removed)
tit_mov_freq	Titillator movements / min
cop_dur	Copula duration (min)
Sp_tran_dur	Spermatophore transfer duration (min)
sucess	Success of spermatophore transfer (yes=1; no=0)
resist_behav	female resistance behaviour during copulation (yes=1; no=0)
walking	female walking during copulation (min)
kicking	number of female kicks
jumping	number of female jumps
biting	number of female bites towards the male
disconnections	number of disconnections during copulation
male_body_mass	male body mass (mg)
spermatophore_mass	spermatophore mass
